1 **Comparative of probiotics reveals cecal microbial**  
2 **component associated with performance parameters in**  
3 **broilers**

4  
5  
6  
7 D.R. Rodrigues<sup>1</sup>, W. Briggs<sup>1</sup>, A. Duff<sup>1</sup>, K. Chasser<sup>1</sup>, R. Murugesan<sup>2</sup>, C. Pender<sup>2</sup>, S. Ramirez<sup>2</sup>, L.  
8 Valenzuela<sup>3</sup>, and L.R. Bielke<sup>1\*</sup>

9  
10  
11  
12 <sup>1</sup>Department of Animal Sciences, The Ohio State University, Columbus, Ohio, United States of  
13 America

14  
15 <sup>2</sup>BIOMIN America Inc., Overland Park, Kansas, United States of America

16  
17 <sup>3</sup>BIOMIN Holding GmbH, Getzersdorf, Austria

18  
19 \*Corresponding author  
20 Email: [bielke.1@osu.edu](mailto:bielke.1@osu.edu)

## 28 **Abstract**

29 Probiotics have become increasingly popular in poultry industry as a promising nutritional  
30 intervention to promote modulation of intestinal microbiota as a means of improving health and  
31 performance. This study aimed to determine the effects of different probiotic formulations on the  
32 cecal microbial communities and performance in 21 and 42 day-old-broilers, as well as to define  
33 associations between ceca microbial profile and growth parameters. Probiotics investigated  
34 included a synbiotic (SYNBIO), a yeast-based probiotic (YEAST), and three single-strain  
35 formulations of spore-forming *Bacillus amyloliquefaciens* (SINGLE1), *B. subtilis* (SINGLE2)  
36 and *B. licheniformis* (SINGLE3). Dietary inclusion of SYNBIO, YEAST, and SINGLE2  
37 increased body weight (BW) by 7, 14, and 21d ( $p<0.05$ ) compared to a basal diet without  
38 probiotics (CON). The treatments SYNBIO, and YEAST decreased mortality by 21d, while  
39 SYNBIO reduced the overall mortality rate by 42d ( $p<0.05$ ). Bifidobacteriales had the highest  
40 ( $p<0.05$ ) population in SINGLE2, whereas Clostridiales was reduced compared to CON,  
41 SINGLE1, and SINGLE3. The addition of SYNBIO into diet mainly stimulated ( $p<0.05$ ) the  
42 cecal relative abundance of Lactobacillales by 21d. Besides, Spearman's correlation analyses  
43 revealed that population of Lactobacillales was associated with lower Enterobacteriales, higher  
44 BW, and lower mortality of growing broilers. These results suggest that the modulation of ceca  
45 microbiota and the greatest productive parameters were achieved by supplementation of specific  
46 probiotic mixture. The selection of probiotics by their ability to drive cecal microbiota towards  
47 lactic acid bacteria colonization may be a strategic approach to improve the indicators of  
48 performance in broilers.

49

50

## 51 **Introduction**

52           Worldwide, the decreased percentage of chickens treated with sub-therapeutic levels of  
53 antibiotics has attracted attention towards a better understanding of dietary alternatives as growth  
54 and health promoters. Among them, probiotics have been indicated as a promising nutritional  
55 intervention to manipulate the avian microbiome [1–4]. Beneficial bacteria colonization of  
56 intestinal microbiota is essential for favoring host growth and performance, while an unfavorable  
57 alteration of the commensal structure may promote enteric infections, thereby deteriorating  
58 welfare and the performance indicators of poultry production [5].

59           Probiotics have become increasingly popular across human medicine and livestock  
60 industry due to the following benefits in the host: stimulation of beneficial microbiota, reduction,  
61 and prevention of pathogen colonization, development of immune system, improvement in  
62 digestive efficiency, and maturation of intestinal microbiota [3,5–9]. Although several bacterial  
63 species and yeasts have been described as potential probiotic for broiler chickens; *Bacillus*,  
64 *Lactobacillus*, *Enterococcus*, *Bifidobacterium*, *Pediococcus*, and *Escherichia* are the most  
65 common bacterial genera used for probiotic formulations, whereas *Saccharomyces cerevisiae* is  
66 the most common yeast [5,7]. Some of the factors that have been claimed to be responsible for  
67 probiotic's efficiency include the microbial viability in the gastrointestinal tract (GIT), the ability  
68 to adhere to epithelial cells and colonize the host GIT, capability to reproduce itself in the host,  
69 and production of metabolites [9,10].

70           However, there have been inconsistencies concerning the effectiveness of probiotic  
71 supplementation in shaping GIT microbial communities and promoting growth. Accordingly, a

72 comprehension of how the microbiota profile modulated by probiotics affect the host phenotype  
73 is still needed. Therefore, the primary aim of this study was to determine the effects of different  
74 probiotic formulations on the cecal microbial communities and performance, as well as to define  
75 associations between ceca microbial profile and growth parameters of broiler chickens.

## 76 **Material and methods**

### 77 **Experimental design and dietary treatments**

78 A total of 720 one-day-old Ross 708 male chicks were allocated to 6 treatments in a  
79 completely randomized design. Eight replicates were assigned to each of the treatments with 15  
80 birds per replicate. Treatments were based on supplemental diets including (1) basal diet without  
81 probiotics (CON); (2) Synbiotic (0.45 g/Kg ; SYNBIO); (3) Yeast-based probiotic (1.12 g/Kg;  
82 YEAST); (4) Single-strain probiotic 1 (0.45 g/Kg; SINGLE1); (5) Single-strain probiotic 2 (0.27  
83 g/Kg; SINGLE2) or (6) Single-strain probiotic 3 (0.45 g/Kg; SINGLE3).

84 The SYNBIO-based mixture was composed of  $2 \times 10^{11}$  CFU/g multi-species probiotic  
85 including *Lactobacillus reuteri*, *Enterococcus faecium*, *Bifidobacterium animalis*, *Pediococcus*  
86 *acidilactici*, and a prebiotic (fructooligosaccharide). The formulation YEAST was a non-  
87 bacterial probiotic-containing *Saccharomyces cerevisiae* (Moisture 11%, Crude fiber 25%). The  
88 single-strain probiotics were composed of spore-forming *Bacillus* spp. Formulation SINGLE1  
89 contained  $1.25 \times 10^6$  CFU/g of *B. amyloliquefaciens*, while SINGLE2 comprised 10 billion  
90 spores/g of *B. subtilis*. Besides, each gram of the SINGLE3 contained  $3.20 \times 10^9$  CFU of *B.*  
91 *licheniformis*.

92 Birds were reared from 1 to 42d and housed in floor pens on fresh wood shavings litter  
93 with *ad libitum* access to a standard corn-soy diet and water [11]. The feeding program consisted  
94 of 3 phases: starter (1-7d), grower (8-21d), and finisher (22- 42d). Stater diets were in mash

95 form, whereas the grower and finisher diets were pelleted. All experimental procedures were  
96 approved by the Ohio State University's Institutional Animal Care and Use Committee  
97 (IACUC).

98

## 99 **Growth performance**

100 The birds were weighed individually weekly for the overall experimental period. Feed  
101 consumption for each pen was recorded by measuring feed residue on the same days as birds  
102 were weighed. Feed conversion ratio (FCR) was calculated as pen feed consumption divided by  
103 body weight gain per pen, corrected for mortality. Mortality was showed as cumulative mortality  
104 per treatment by 21 and 42 days of age.

105

## 106 **Sample collection and processing**

107 To investigate the intestinal microbiota composition of probiotic-treated broilers on days  
108 21 and 42, ceca were collected from four birds per pen for DNA extraction and next-generation  
109 sequencing (NGS). Cecal contents were weighed and mixed to create pooled samples from two  
110 birds (n=16 per treatment for each time collection) for DNA extraction. Next, 0.3g of the mixed  
111 digesta was added into a 2.0mL screwcap microcentrifuge tube with 0.2g of zirconia beads  
112 (0.1mm). DNA was extracted from each sample, along with pure culture bacterial samples, using  
113 the protocol from Arthur et al. [12] with several modifications. After extractions were completed,  
114 DNA quality and quantity were measured using a Synergy HTX, Multi-Mode Reader (BioTek,  
115 Winooski, VT), and all samples were diluted to a concentration of 20ng/ $\mu$ L for NGS analysis.

116

## 117 **16S Sequencing Analysis**

118           Generation of PCR amplicon was achieved by amplification of the V4-V5 region of the  
119 16S rRNA gene using 515F and 806R primers (515F: GTGYCAGCMGCCGCGGTAA, 806R:  
120 GGACTACHVGGGTWTCTAAT). DNA samples were library prepared for NGS using the  
121 Illumina MiSeq platform (2 x 300 bp; Illumina, San Diego, CA, USA) by Ohio State University  
122 Molecular and Cellular Imaging Center.

123           A sequence quality screen was performed to ensure high-quality sequences were  
124 submitted to the analysis pipeline. Briefly stated, sequence quality was determined using the  
125 FASTQC and MultiQC toolkits. Sequence reads exhibiting a quality score of lower than 20 were  
126 removed. Further, low complexity reads, those shorter than 200 bp in length, and mismatched  
127 primers were also eliminated. Additionally, reads exhibiting low sequence qualities on either end  
128 were trimmed. The pre-processed FASTQ files were then imported to the QIIME2 platform for  
129 analysis. The main analytical steps were as follows: firstly, reads were de-multiplexed and  
130 classified into their respective samples. Next, additional sequence quality control measures and  
131 feature table construction were performed by the DADA2 algorithm implementation in QIIME2.  
132 Quality control measures eliminated reads with barcode errors, along with reads that had more  
133 than two nucleotides mismatches, and chimeras. The high-quality sequences originating from the  
134 afore-mentioned quality control measures were subsequently clustered together using the q2-  
135 feature-classifier plugin with the GreenGenes 13.8 reference database. The resulting feature table  
136 was used to calculate phylum and order-level abundance infographics.

137

## 138 **Statistical Analysis**

139 All data were subjected to Analysis of Variance (ANOVA) as a completely randomized  
140 design using the JMP Pro13 Software (JMP Software, SAS Inc., 2018). Body weight (BW), Feed  
141 intake (FI) and FCR were compared using Student's *t*-test ( $p \leq 0.05$ ) to determine differences across  
142 groups. The mean relative abundances of microbial communities were also compared with a  
143 Student's *t*-test ( $p \leq 0.05$ ). For mortality, data were analyzed using the Chi-Square test ( $p \leq 0.05$ )  
144 in SAS (SAS Inc., 2018). Additionally, the Spearman's rank correlation coefficient (R) was applied  
145 to identify correlations between bacterial colonization patterns and performance parameters (R  
146 software version 3.4.1).

147

## 148 **Results**

### 149 **Growth performance parameters**

150 Dietary inclusion of SYN BIO, YEAST, and SINGLE2 increased BW by 7, 14, and 21d  
151 compared to CON ( $p < 0.05$ ; Fig 1).

#### 152 **Fig 1. Performance parameters of broilers fed different probiotics from 1 to 42 days of age.**

153 <sup>a-c</sup> Different letters in the same row indicate statistical differences ( $p < 0.05$ , Student's *t*-test). Broilers fed  
154 basal diet without probiotics (CON), synbiotic (SYN BIO), yeast-based probiotic (YEAST), or single-strain  
155 formulations composed of *B. amyloliquefaciens* (SINGLE1), *B. subtilis* (SINGLE2), and *B. licheniformis*  
156 (SINGLE3).

157 In addition, broilers fed SYN BIO were heavier ( $p < 0.05$ ) than CON and SINGLE1 on day  
158 28. By 35d and 42d, no significant differences were found in BW when compared against CON.  
159 Supplementation of probiotics in the diet increased ( $p < 0.05$ ) FI during d1-7 (Fig 1). However,  
160 there was no significant difference in FI between probiotic treatments and CON during all growth

161 periods, except for d28-35, in which there was a significant increase of FI in SINGLE3. Similarly,  
162 no significant effect of probiotic supplementation was observed in FCR during d1-14 and d21-42.  
163 From d14 to 21, SINGLE2 had a statistically higher FCR ( $p<0.05$ ) related to CON (Fig 1).

164 There was lower cumulative mortality in SYN BIO and YEAST treated birds by 21d. On  
165 42d, dietary inclusion of SYN BIO significantly reduced the rate of mortality ( $p=0.03$ ; Fig 1).

166

## 167 **Microbiota Composition**

168 A total of 5,348,269 16S rRNA sequence reads were obtained. The number of mapped  
169 sequence reads of overall samples ranged from 13,545 to 60,125, with a mean of 27,855.82.

170 In order to assess the impact of different probiotics supplementation on cecal bacterial  
171 populations, 16S-derived microbial community was analyzed at the taxonomic rankings of  
172 phylum and order levels.

173 Similar to many microbiome previous studies, the dominant cecal population mapped to  
174 the Firmicutes, Actinobacteria, and Proteobacteria (Table in S1 Table). On day 21, the relative  
175 abundance of the Actinobacteria phylum was statistically higher in SINGLE2 than CON and  
176 YEAST (Fig 2 A).

177 **Fig 2. Cecal bacterial abundance at phylum-level of broilers fed different probiotics by 21**  
178 **and 42 days of age.** (A) Hierarchical clustering shown in a heat map of microbial communities  
179 profiles of samples from broilers fed basal diet without probiotics (CON), synbiotic (SYN BIO),  
180 yeast-based probiotic (YEAST), or single-strain formulations composed of *B. amyloliquefaciens*  
181 (SINGLE1), *B. subtilis* (SINGLE2), and *B. licheniformis* (SINGLE3) by 21 and (B) 42 days of  
182 age. . Statistical differences ( $p<0.05$ ) between groups were reported for each bacterial population  
183 (\*).



184 Similarly, Bifidobacteriales order had the highest ( $p<0.05$ ) population in SINGLE2 (Fig  
185 3A).

186 **Fig 3. Microbial composition in the cecum digesta of 21-day-old broilers.** Box plots show the  
187 relative abundance of the top four order-level bacterial population found in the ceca of broilers,  
188 including (A) Bifidobacteriales, (B) Enterobacteriales, (C) Clostridiales, and (D) Lactobacillales.  
189 The (\*) at the top of the index represents significant differences between treatments ( $p<0.05$ ).

190 There were significant changes concerning the Firmicutes phylum population at d21,  
191 which was reduced in SINGLE2 compared to CON and other treatments (Fig 2A). Clostridiales  
192 population was lower in ceca of SINGLE2 than CON, SINGLE1, and SINGLE3 (Fig 3C). In  
193 addition, supplementation of SYN BIO mainly stimulated ( $p<0.05$ ) the cecal relative abundance  
194 of Lactobacillales order and decreased the Bacteroidetes phylum abundance compared to CON  
195 (Fig 3D; Table in S1 Table).

196 Bacteria belonging to the Proteobacteria phylum and Enterobacteriales order were not  
197 affected ( $p>0.05$ ) by probiotic supplementation (Fig 2A), although a decrease in the relative  
198 abundance of these microbial communities were observed at 42d (Fig 2B).

199 **Fig 4. Order-level taxonomic distribution among samples from cecal contents of 42-day-old**  
200 **broilers.** Bars represent the mean relative percentage of each bacterial population within samples  
201 from broilers treated with a basal diet without probiotics (CON), synbiotic (SYNBIO), yeast-  
202 based probiotic (YEAST), or single-strain formulations composed of *B. amyloliquefaciens*  
203 (SINGLE1), *B. subtilis* (SINGLE2), and *B. licheniformis* (SINGLE3). (A) Bifidobacteriales, (B)  
204 Enterobacteriales, (C) Clostridiales, and (D) Lactobacillales. The (\*) at the top of the index  
205 represents significant differences between treatments ( $p<0.05$ ).

206 Dietary treatments had minimal effects on cecal microbiota by 42 days of age. It may be  
207 noted that the Tenericutes population was increased in YEAST, SINGLE1, SINGLE2, and  
208 SINGLE3 ( $p<0.05$ ). Besides, SINGLE2 had a lower abundance of Actinobacteria than  
209 SINGLE3, but no differences compared to CON were observed (Fig 2B)

210

## 211 **Correlation between microbiota composition and performance**

### 212 **parameters**

213 To further analyze the associations between cecal microbiome and host performance  
214 parameters, we conducted Spearman's correlation linking the four discrepant order-level  
215 microbial taxa, BW, and mortality by 21 and 42 days of age. The Spearman's rank correlation  
216 showed that abundances of Lactobacillales were negatively associated with Clostridiales by 21  
217 days of age (Fig 5A).

218 **Fig 5. Spearman's rank correlation matrix of the dominant microbial populations and**  
219 **growth performance parameters.** (A) Strong correlations are indicated by large circles. The  
220 colors of the scale bar denote the nature of the correlation with 1 indicating a perfect positive  
221 correlation (dark blue) and -1 indicating perfect negative correlation (dark red). (B)  
222 Lactobacillales population by 21d was positively correlated with ( $R=0.94$ ,  $p=0.048$ ) Body  
223 Weight (BW) and negatively ( $R=-0.93$ ,  $p=0.007$ ) related to mortality rates (Mort). (C) At the  
224 same age, Clostridiales was negatively ( $R=-0.89$ ,  $p=0.01$ ) related to BW and positively ( $r=0.81$ ,  
225  $p=0.05$ ) associated with mortality. Only significant Spearman's correlation coefficients were  
226 screened.

227 Another interesting interaction between components of microbiota was the negative  
228 correlation among Enterobacteriales and Lactobacillales. Likewise, according to these analyses,  
229 the BW at d21 positively impacted BW at d42, and negatively influenced the mortality rate at  
230 both ages. A strong positive correlation between the cecal Lactobacillales population and BW  
231 ( $R=0.94$ ,  $p=0.048$ ; Fig 5B) at 21d was observed. At the same age, Lactobacillales' relative  
232 abundance was negatively associated with the mortality rate ( $R=-0.93$ ,  $p=0.007$ ). These results  
233 indicate that a higher population of Lactobacillales in the ceca may be a marker of better  
234 performance for young broilers (21 days of age).

235 Similar associations were found within the Clostridiales population, which was  
236 negatively related to BW ( $R=-0.89$ ,  $p=0.01$ ; Fig 5C) and positively associated with mortality by  
237 21 days of age. Interestingly, the greatest correlation was only identified at an earlier age.

238

## 239 **Discussion**

240 This study was conducted in order to gain a better comprehension of how different  
241 probiotic formulations could modulate the cecal microbiota and impact on the indicators of  
242 performance in broilers throughout 42 days of age. Besides, the objective of the present  
243 investigation was also to identify an association between GIT microbiota phenotype and growth  
244 parameters. Our findings suggest that the greatest productive parameters of 21-day-old broilers  
245 promoted by specific probiotic-based supplementation were associated with a cecal microbial  
246 component.

247 The addition of probiotics into the diets supported a significant stimulation of FI and BW  
248 by 7 days of age. Probiotics seemed to have the greatest effect during the initial development of

249 the microbiota [13]. As a consequence of limited contact with the hens' microbiota, the assembly  
250 of the intestinal microbiome of the newly hatched chicks is predominantly influenced by the  
251 hatchery and farm environment [14–17]. Thus, an immediate supplementation of probiotics post-  
252 hatch is more important in avian species than in other animals [7]. The early exposure to  
253 microbial preparations has been identified as an approach to modulate the microbiota towards  
254 beneficial bacterial growth [3,4] and pathogen colonization reduction [18]. Additionally,  
255 supplementation of probiotics has been successfully linked to GIT development by stimulating  
256 the growth of villus surface area [18,19]. Other probiotic action mechanisms include maturation  
257 of immune system, improvement of gut barrier function, and the presence of highly competitive  
258 microbial communities, which can lead exclusion of pathogenic bacteria through competitive  
259 exclusion [3,5–9].

260 By 21 days of age, the probiotic mixture played a key role in improving bird BW. Dietary  
261 inclusion of YEAST and the bacteria-based probiotic SYN BIO consistently outperformed the  
262 CON birds. Although SINGLE2 increased BW at the same age, the feed efficiency (FI and FCR)  
263 was deteriorated compared to CON-treated broilers. Dietary supplementation of live yeast, yeast  
264 cultures, or yeast cell wall products was shown to have positive effects on animal performance  
265 [20–23]. Similar to our findings, Yalçın et al., 2013 showed that *Saccharomyces cerevisiae*  
266 supplementation improved weight gain during the starter period of broiler chickens, although  
267 there were no effects on final weight (42d). The performance improvements seen in SYN BIO  
268 were previously reported by Eckert et al., 2010. Enhanced performance promoted by synbiotic  
269 products may be related to the improvement in nutrient absorption, reduction of pathogens  
270 colonization, and stimulation of the immune response [19,24,25].

271           The results found in this study demonstrated that there was a treatment-specific effect on  
272   microbiota profiles, particularly evident in birds fed SINGLE2 and SYN BIO probiotics. It has  
273   been thought that many factors, such as the early intestinal colonization, physiologic stage of  
274   chickens, diet, or environment, can drive the composition and diversity of intestinal microbial  
275   communities [2–4,15,26,27]. The findings achieved here have shown that particular probiotic  
276   mixtures may also have benefits in modulating the microbiota of broilers. Of relevance, the  
277   supplementation of SYMBIO resulted in a robust modulation of intestinal microbiota with a high  
278   population of Lactobacillales, which may be explained by the ability of the lactic acid bacteria  
279   (LAB) strains, supplemented in the feed, to colonize and persist in the GIT. Moreover, the  
280   addition of prebiotics into the mixture may support the growth and activity of the probiotic and  
281   GIT beneficial bacteria [28]. Similar results were found in layers, in which the addition of  
282   SYNBIO in the feed increased the relative abundance of LAB in ceca showing that the  
283   supplemented strains survived and colonized the GIT [19]. Nevertheless, probiotics can also  
284   affect the development of the microbiota without effectively colonizing it by merely passing  
285   through the intestinal tract [15]. In this context, although the Bacillales did not become a resident  
286   of the cecal microbiome, it is possible that the supplementation of SINGLE2 possibly created a  
287   favorable environment for the Bifidobacteriales grow.

288           We further looked for associations between the cecal predominant microbial signature  
289   and indicators of growth parameters. Lactobacillales population in ceca was positively correlated  
290   to BW at 21d and negatively associated with mortality rate. The association between improved  
291   weight gain and LAB has also been observed by Yan et al., 2017 and De Cesare et al., 2019.  
292   Hence, LAB may be able to enhance the energy and mineral recovery from nutrients; its higher  
293   intestinal colonization results in a better digestive efficiency [29,31]. It is likely that the high

294 abundance of Lactobacillales found in SYN BIO may have contributed to increasing the BW at  
295 21d and 28d, as well as decreasing the overall number of dead birds in this treatment.

296 Spearman's correlation analyses also revealed that the Clostridiales was negatively  
297 related to BW by 21d. This association was highly evident in SINGLE2 treated birds, which had  
298 the lowest Clostridiales population and increased BW compared to CON group. Clostridiales  
299 were the dominant order accounting for almost 83% of the entire cecal microbiota among  
300 treatments. Although Clostridiales members are known as the main responsible for short-chain  
301 fatty acid metabolism in chicken cecum (Oakley et al., 2014; Pandit et al., 2018), obtaining  
302 insights into how higher diversity and high colonization of other bacterial communities in ceca  
303 can influence growth parameters may have important implications for selecting probiotic  
304 formulations.

305 The results presented here are evidence that supplementation of specific probiotics  
306 mixtures, particularly seen with SYN BIO, can modulate the microbiota that colonizes the gut  
307 shortly after hatch, thereby influencing the performance and survival of chicks during their  
308 growth. Unlike the grower phase, the supplementation of probiotics did not affect the  
309 performance or cecal profile by 42d. It is worth highlighting that these chickens were under  
310 experimental conditions without a pathogen challenge or stress induction. It would be interesting  
311 for future studies to evaluate the tested probiotic formulations under challenge conditions to  
312 determine if the ongoing administration is necessary to affect microbiota profile and  
313 performance.

314 In conclusion, this study illustrated that not all probiotic-based formulations modulated  
315 the ceca microbiota to a similar extent, nor resulted in improved performance. The population of  
316 Lactobacillales was identified to be strongly associated with lower Enterobacteriales, higher BW,

317 and lower mortality of growing broilers. Accordingly, the selection of probiotic mixture by their  
318 ability to drive cecal microbiota towards LAB colonization may be a strategic approach to  
319 improve the indicators of performance in broiler chickens.

## 320 References

- 321 1. Roto SM, Kwon YM, Ricke SC. Applications of In Ovo Technique for the Optimal  
322 Development of the Gastrointestinal Tract and the Potential Influence on the Establishment  
323 of Its Microbiome in Poultry. *Front Vet Sci.* 2016;3. doi:10.3389/fvets.2016.00063
- 324 2. Baldwin S, Hughes RJ, Hao Van TT, Moore RJ, Stanley D. At-hatch administration of  
325 probiotic to chickens can introduce beneficial changes in gut microbiota. Suchodolski JS,  
326 editor. *PLOS ONE.* 2018;13: e0194825. doi:10.1371/journal.pone.0194825
- 327 3. Rodrigues DR, Wilson K, Brings W, Duff A, Chasser K, Bielke LR. Intestinal pioneer  
328 colonizers as drivers of ileal microbial composition and diversity of broiler chickens. *Front*  
329 *Microbiol.* 2019 (*under review*).
- 330 4. Wilson K, Rodrigues DR, Brings W, Duff A, Chasser K, Bielke LR. Evaluation of the  
331 impact of in ovo administered bacteria on microbiome of chicks through ten days of age.  
332 *Poult Sci.* 2019. doi:doi: 10.3382/ps/pez388
- 333 5. Kogut MH. The effect of microbiome modulation on the intestinal health of poultry. *Anim*  
334 *Feed Sci Technol.* 2019;250: 32–40. doi:10.1016/j.anifeedsci.2018.10.008
- 335 6. Mazmanian SK, Liu CH, Tzianabos AO, Kasper DL. An Immunomodulatory Molecule of  
336 Symbiotic Bacteria Directs Maturation of the Host Immune System. *Cell.* 2005;122: 107–  
337 118. doi:10.1016/j.cell.2005.05.007
- 338 7. Lutful Kabir SM. The Role of Probiotics in the Poultry Industry. *Int J Mol Sci.* 2009;10:  
339 3531–3546. doi:10.3390/ijms10083531
- 340 8. Pender CM, Kim S, Potter TD, Ritzi MM, Young M, Dalloul RA. In ovo supplementation  
341 of probiotics and its effects on performance and immune-related gene expression in broiler  
342 chicks. *Poult Sci.* 2017;96: 1052–1062. doi:10.3382/ps/pew381
- 343 9. Clavijo V, Flórez MJV. The gastrointestinal microbiome and its association with the control  
344 of pathogens in broiler chicken production: A review. *Poult Sci.* 2018;97: 1006–1021.  
345 doi:10.3382/ps/pex359
- 346 10. Terpou A, Papadaki A, Lappa IK, Kachrimanidou V, Bosnea LA, Kopsahelis N. Probiotics  
347 in Food Systems: Significance and Emerging Strategies Towards Improved Viability and  
348 Delivery of Enhanced Beneficial Value. *Nutrients.* 2019;11: 1591. doi:10.3390/nu11071591
- 349 11. Nutrient Requirements of Poultry. *Nutrient Requirements of Poultry.* 1994.  
350 doi:10.17226/2114
- 351 12. Arthur JC, Perez-Chanona E, Mühlbauer M, Tomkovich S, Uronis JM, Fan T-J, et al.  
352 Intestinal inflammation targets cancer-inducing activity of the microbiota. *Science.*  
353 2012;338: 120–123. doi:10.1126/science.1224820



- 354 13. Oakley BB, Lillehoj HS, Kogut MH, Kim WK, Maurer JJ, Pedroso A, et al. The chicken  
355 gastrointestinal microbiome. *FEMS Microbiol Lett.* 2014;360: 100–112. doi:10.1111/1574-  
356 6968.12608
- 357 14. Ballou AL, Ali RA, Mendoza MA, Ellis JC, Hassan HM, Croom WJ, et al. Development of  
358 the Chick Microbiome: How Early Exposure Influences Future Microbial Diversity. *Front*  
359 *Vet Sci.* 2016;3. doi:10.3389/fvets.2016.00002
- 360 15. Kubasova T, Kollarcikova M, Crhanova M, Karasova D, Cejkova D, Sebkova A, et al.  
361 Contact with adult hen affects development of caecal microbiota in newly hatched chicks.  
362 *PLOS ONE.* 2019;14: e0212446. doi:10.1371/journal.pone.0212446
- 363 16. Rubio LA. Possibilities of early life programming in broiler chickens via intestinal  
364 microbiota modulation. *Poult Sci.* 2018 [cited 23 Jan 2019]. doi:10.3382/ps/pey416
- 365 17. Stanley D, Geier MS, Hughes RJ, Denman SE, Moore RJ. Highly Variable Microbiota  
366 Development in the Chicken Gastrointestinal Tract. *PLOS ONE.* 2013;8: e84290.  
367 doi:10.1371/journal.pone.0084290
- 368 18. Teague KD, Graham LE, Dunn JR, Cheng HH, Anthony N, Latorre JD, et al. In ovo  
369 evaluation of FloraMax®-B11 on Marek's disease HVT vaccine protective efficacy,  
370 hatchability, microbiota composition, morphometric analysis, and *Salmonella enteritidis*  
371 infection in broiler chickens. *Poult Sci.* 2017;96: 2074–2082. doi:10.3382/ps/pew494
- 372 19. Luoma A, Markazi A, Shanmugasundaram R, Murugesan GR, Mohnl M, Selvaraj R. Effect  
373 of synbiotic supplementation on layer production and cecal *Salmonella* load during a  
374 *Salmonella* challenge. *Poult Sci.* 2017;96: 4208–4216. doi:10.3382/ps/pex251
- 375 20. Haldar S, Ghosh TK, Toshiwati, Bedford MR. Effects of yeast (*Saccharomyces cerevisiae*)  
376 and yeast protein concentrate on production performance of broiler chickens exposed to  
377 heat stress and challenged with *Salmonella enteritidis*. *Anim Feed Sci Technol.* 2011;168:  
378 61–71. doi:10.1016/j.anifeedsci.2011.03.007
- 379 21. Yalçın S, Eser H, Yalçın S, Cengiz S, Eltan Ö. Effects of dietary yeast autolysate  
380 (*Saccharomyces cerevisiae*) on performance, carcass and gut characteristics, blood profile,  
381 and antibody production to sheep red blood cells in broilers. *J Appl Poult Res.* 2013;22: 55–  
382 61. doi:10.3382/japr.2012-00577
- 383 22. Ezema C, Ugwu CC. Yeast (*Saccharomyces cerevisiae*) as a Probiotic of Choice for Broiler  
384 Production. In: Liang M-T, editor. *Beneficial Microorganisms in Agriculture, Aquaculture*  
385 *and Other Areas.* Cham: Springer International Publishing; 2015. pp. 59–79.  
386 doi:10.1007/978-3-319-23183-9\_4
- 387 23. Xu J, Li Y, Yang Z, Li C, Liang H, Wu Z, et al. Yeast Probiotics Shape the Gut  
388 Microbiome and Improve the Health of Early-Weaned Piglets. *Front Microbiol.* 2018;9.  
389 doi:10.3389/fmicb.2018.02011

- 390 24. Eckert NH, Lee JT, Hyatt D, Stevens SM, Anderson S, Anderson PN, et al. Influence of  
391 probiotic administration by feed or water on growth parameters of broilers reared on  
392 medicated and nonmedicated diets. *J Appl Poult Res.* 2010;19: 59–67.  
393 doi:10.3382/japr.2009-00084
- 394 25. Ritzi MM, Abdelrahman W, Mohnl M, Dalloul RA. Effects of probiotics and application  
395 methods on performance and response of broiler chickens to an *Eimeria* challenge. *Poult*  
396 *Sci.* 2014;93: 2772–2778. doi:10.3382/ps.2014-04207
- 397 26. Lu J, Idris U, Harmon B, Hofacre C, Maurer JJ, Lee MD. Diversity and Succession of the  
398 Intestinal Bacterial Community of the Maturing Broiler Chicken. *Appl Environ Microbiol.*  
399 2003;69: 6816–6824. doi:10.1128/AEM.69.11.6816-6824.2003
- 400 27. Heiman ML, Greenway FL. A healthy gastrointestinal microbiome is dependent on dietary  
401 diversity. *Mol Metab.* 2016;5: 317–320. doi:10.1016/j.molmet.2016.02.005
- 402 28. Markowiak P, Ślizewska K. Effects of Probiotics, Prebiotics, and Synbiotics on Human  
403 Health. *Nutrients.* 2017;9. doi:10.3390/nu9091021
- 404 29. Yan W, Sun C, Yuan J, Yang N. Gut metagenomic analysis reveals prominent roles of  
405 *Lactobacillus* and cecal microbiota in chicken feed efficiency. *Sci Rep.* 2017;7: 45308.  
406 doi:10.1038/srep45308
- 407 30. De Cesare A, Faria do Valle Ì, Sala C, Sirri F, Astolfi A, Castellani G, et al. Effect of a low  
408 protein diet on chicken ceca microbiome and productive performances. *Poult Sci.* 2019;98:  
409 3963–3976. doi:10.3382/ps/pez132
- 410 31. Pessione E. Lactic acid bacteria contribution to gut microbiota complexity: lights and  
411 shadows. *Front Cell Infect Microbiol.* 2012;2. doi:10.3389/fcimb.2012.00086
- 412 32. Pandit RJ, Hinsu AT, Patel NV, Koringa PG, Jakhesara SJ, Thakkar JR, et al. Microbial  
413 diversity and community composition of caecal microbiota in commercial and indigenous  
414 Indian chickens determined using 16s rDNA amplicon sequencing. *Microbiome.* 2018;6:  
415 115. doi:10.1186/s40168-018-0501-9

416

417

418

419

420

421

422

423

424 **Supporting information**

425 **S1 Table. Phylum-level taxonomic of cecal microbial communities in broilers at 21 and 42**

426 **days of age**

427 **S2 Table. Spearman's rank correlation matrix of the dominant microbial populations and**

428 **growth performance parameters**

429

430

431

432

433

434

435

436

437

438

| <b>Days</b>                                                  | <b>CON</b>                 | <b>SYNBIO</b>              | <b>YEAST</b>                | <b>SINGLE1</b>            | <b>SINGLE2</b>             | <b>SINGLE3</b>              | <b><i>p</i>-value</b> | <b>SEM</b> |
|--------------------------------------------------------------|----------------------------|----------------------------|-----------------------------|---------------------------|----------------------------|-----------------------------|-----------------------|------------|
| <b>Body Weight (Kg) ± SE</b>                                 |                            |                            |                             |                           |                            |                             |                       |            |
| d0                                                           | 0.36 ± 0.2 <sup>a</sup>    | 0.36 ± 0.2 <sup>a</sup>    | 0.37 ± 0.2 <sup>a</sup>     | 0.36 ± 0.2 <sup>a</sup>   | 0.36 ± 0.2 <sup>a</sup>    | 0.37 ± 0.2 <sup>a</sup>     | 0.4022                | 0.09       |
| d7                                                           | 0.114 ± 2.2 <sup>b</sup>   | 0.123 ± 1.8 <sup>a</sup>   | 0.124 ± 2.2 <sup>a</sup>    | 0.116 ± 2.1 <sup>b</sup>  | 0.123 ± 2.0 <sup>a</sup>   | 0.126 ± 1.9 <sup>a</sup>    | <.0001                | 0.84       |
| d14                                                          | 0.330 ± 7.0 <sup>bc</sup>  | 0.354 ± 5.3 <sup>a</sup>   | 0.355 ± 6.4 <sup>a</sup>    | 0.329 ± 5.9 <sup>c</sup>  | 0.348 ± 6.3 <sup>a</sup>   | 0.347 ± 6.2 <sup>ab</sup>   | 0.0056                | 2.57       |
| d21                                                          | 0.738 ± 14.1 <sup>bc</sup> | 0.779 ± 10.3 <sup>a</sup>  | 0.774 ± 13.2 <sup>a</sup>   | 729 ± 11.8 <sup>c</sup>   | 0.774 ± 12.0 <sup>a</sup>  | 0.764 ± 11.8 <sup>ab</sup>  | 0.0132                | 4.98       |
| d28                                                          | 1,335 ± 29.5 <sup>bc</sup> | 1,408 ± 20.7 <sup>a</sup>  | 1,384 ± 26.7 <sup>abc</sup> | 1,315 ± 26.7 <sup>c</sup> | 1,392 ± 23.2 <sup>ab</sup> | 1,380 ± 26.7 <sup>abc</sup> | 0.0844                | 10.45      |
| d35                                                          | 2,075 ± 42.2 <sup>ab</sup> | 2,159 ± 31.6 <sup>a</sup>  | 2,129 ± 36.1 <sup>ab</sup>  | 2,031 ± 40.7 <sup>b</sup> | 2,144 ± 38.2 <sup>a</sup>  | 2,156 ± 37.7 <sup>a</sup>   | 0.111                 | 15.28      |
| d42                                                          | 2,983 ± 63.7 <sup>ab</sup> | 3,033 ± 46.7 <sup>ab</sup> | 2,981 ± 55.4 <sup>ab</sup>  | 2,893 ± 61.2 <sup>b</sup> | 3,051 ± 58.5 <sup>ab</sup> | 3,054 ± 55.1 <sup>a</sup>   | 0.3432                | 22.76      |
| <b>Feed Intake (Kg) ± SE</b>                                 |                            |                            |                             |                           |                            |                             |                       |            |
| d0-7                                                         | 0.119 ± 3.9 <sup>b</sup>   | 0.135 ± 2.0 <sup>a</sup>   | 0.131 ± 4.8 <sup>a</sup>    | 0.130 ± 2.5 <sup>a</sup>  | 0.137 ± 3.5 <sup>a</sup>   | 0.132 ± 2.3 <sup>a</sup>    | 0.0168                | 0.03       |
| d7-14                                                        | 0.273 ± 12.1 <sup>a</sup>  | 0.259 ± 8.6 <sup>a</sup>   | 0.268 ± 9.1 <sup>a</sup>    | 0.261 ± 10.5 <sup>a</sup> | 0.257 ± 6.5 <sup>a</sup>   | 0.264 ± 5.8 <sup>a</sup>    | 0.8503                | 0.02       |
| d14-21                                                       | 0.534 ± 18.2 <sup>b</sup>  | 0.595 ± 11.3 <sup>ab</sup> | 0.602 ± 32.4 <sup>ab</sup>  | 0.551 ± 14.5 <sup>b</sup> | 0.627 ± 30.2 <sup>a</sup>  | 0.583 ± 18.5 <sup>ab</sup>  | 0.0841                | 0.02       |
| d21-28                                                       | 0.569 ± 28.7 <sup>ab</sup> | 0.616 ± 16.6 <sup>a</sup>  | 0.585 ± 13.7 <sup>ab</sup>  | 0.530 ± 32.8 <sup>b</sup> | 0.576 ± 17.3 <sup>ab</sup> | 0.605 ± 17.8 <sup>a</sup>   | 0.1046                | 0.02       |
| d28-35                                                       | 0.749 ± 33.1 <sup>bc</sup> | 0.792 ± 21.1 <sup>ab</sup> | 0.774 ± 13.4 <sup>ab</sup>  | 0.681 ± 36.2 <sup>c</sup> | 0.728 ± 25.6 <sup>bc</sup> | 0.828 ± 14.7 <sup>a</sup>   | 0.0039                | 0.02       |
| d35-42                                                       | 0.971 ± 44.1 <sup>ab</sup> | 0.980 ± 39.0 <sup>a</sup>  | 0.906 ± 14.8 <sup>ab</sup>  | 0.880 ± 41.3 <sup>b</sup> | 0.934 ± 30.7 <sup>ab</sup> | 0.990 ± 30.7 <sup>a</sup>   | 0.1629                | 0.02       |
| <b>Feed Conversion Ratio (g/g) ± SE</b>                      |                            |                            |                             |                           |                            |                             |                       |            |
| d0-7                                                         | 1.62 ± 0.09 <sup>a</sup>   | 1.61 ± 0.07 <sup>a</sup>   | 1.52 ± 0.08 <sup>a</sup>    | 1.64 ± 0.05 <sup>a</sup>  | 1.62 ± 0.08 <sup>a</sup>   | 1.50 ± 0.07 <sup>a</sup>    | 0.6668                | 0.03       |
| d7-14                                                        | 1.27 ± 0.06 <sup>a</sup>   | 1.14 ± 0.04 <sup>a</sup>   | 1.18 ± 0.03 <sup>a</sup>    | 1.20 ± 0.05 <sup>a</sup>  | 1.17 ± 0.04 <sup>a</sup>   | 1.20 ± 0.03 <sup>a</sup>    | 0.5117                | 0.02       |
| d14-21                                                       | 1.33 ± 0.01 <sup>b</sup>   | 1.43 ± 0.03 <sup>ab</sup>  | 1.45 ± 0.06 <sup>ab</sup>   | 1.41 ± 0.03 <sup>ab</sup> | 1.53 ± 0.07 <sup>a</sup>   | 1.40 ± 0.03 <sup>ab</sup>   | 0.1548                | 0.02       |
| d21-28                                                       | 1.52 ± 0.04 <sup>a</sup>   | 1.50 ± 0.02 <sup>a</sup>   | 1.50 ± 0.04 <sup>a</sup>    | 1.52 ± 0.06 <sup>a</sup>  | 1.48 ± 0.04 <sup>a</sup>   | 1.47 ± 0.05 <sup>a</sup>    | 0.9454                | 0.02       |
| d28-35                                                       | 1.66 ± 0.04 <sup>a</sup>   | 1.63 ± 0.06 <sup>a</sup>   | 1.66 ± 0.03 <sup>a</sup>    | 1.63 ± 0.03 <sup>a</sup>  | 1.61 ± 0.06 <sup>a</sup>   | 1.68 ± 0.07 <sup>a</sup>    | 0.9496                | 0.02       |
| d35-42                                                       | 1.83 ± 0.06 <sup>a</sup>   | 1.79 ± 0.06 <sup>a</sup>   | 1.76 ± 0.06 <sup>a</sup>    | 1.74 ± 0.05 <sup>a</sup>  | 1.81 ± 0.06 <sup>a</sup>   | 1.76 ± 0.03 <sup>a</sup>    | 0.8919                | 0.02       |
| d0-42                                                        | 1.85 ± 0.06 <sup>a</sup>   | 1.85 ± 0.03 <sup>a</sup>   | 1.86 ± 0.04 <sup>a</sup>    | 1.90 ± 0.07 <sup>a</sup>  | 1.92 ± 0.09 <sup>a</sup>   | 1.80 ± 0.05 <sup>a</sup>    | 0.7915                | 0.02       |
| <b>Cumulative mortality (mortality/ birds per treatment)</b> |                            |                            |                             |                           |                            |                             |                       |            |
| d0-21                                                        | 11/120 <sup>a</sup>        | 2/120 <sup>b</sup>         | 3/120 <sup>b</sup>          | 9/120 <sup>a</sup>        | 5/120 <sup>a</sup>         | 9/120 <sup>a</sup>          | 0.0007                | 1.50       |
| d0-42                                                        | 21/120 <sup>a</sup>        | 10/120 <sup>b</sup>        | 15/120 <sup>a</sup>         | 20/120 <sup>a</sup>       | 15/120 <sup>a</sup>        | 15/120 <sup>a</sup>         | 0.0340                | 1.64       |

Figure 1

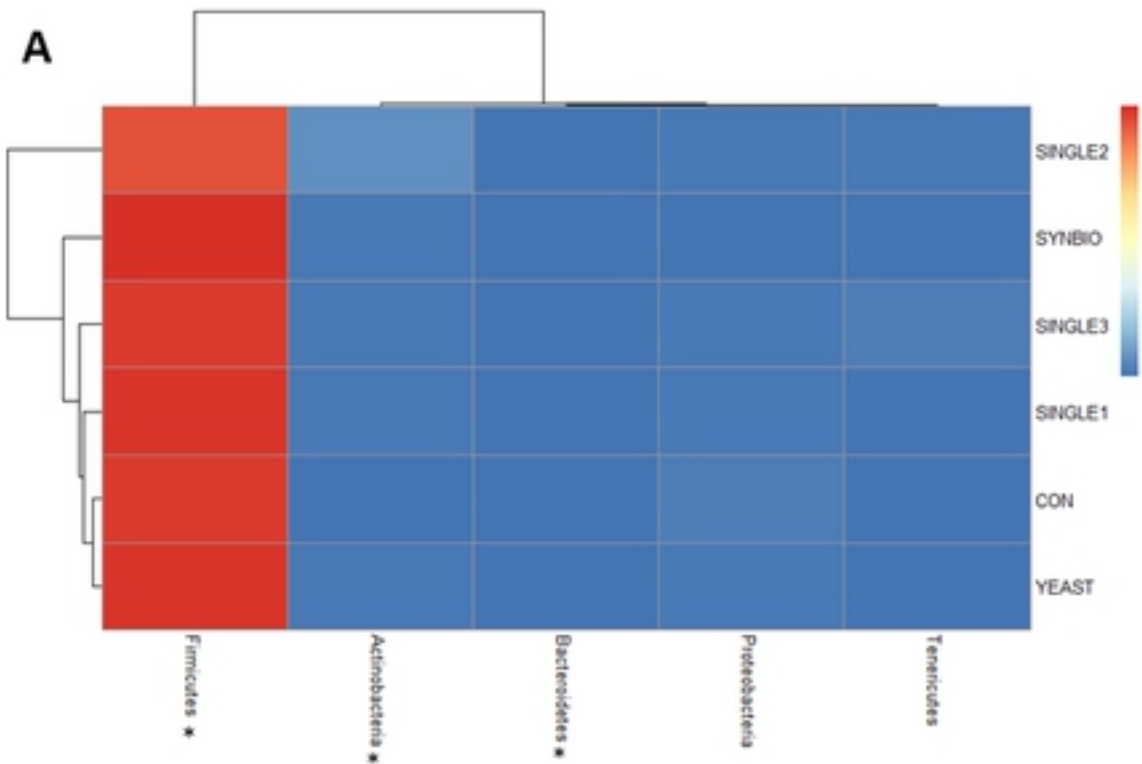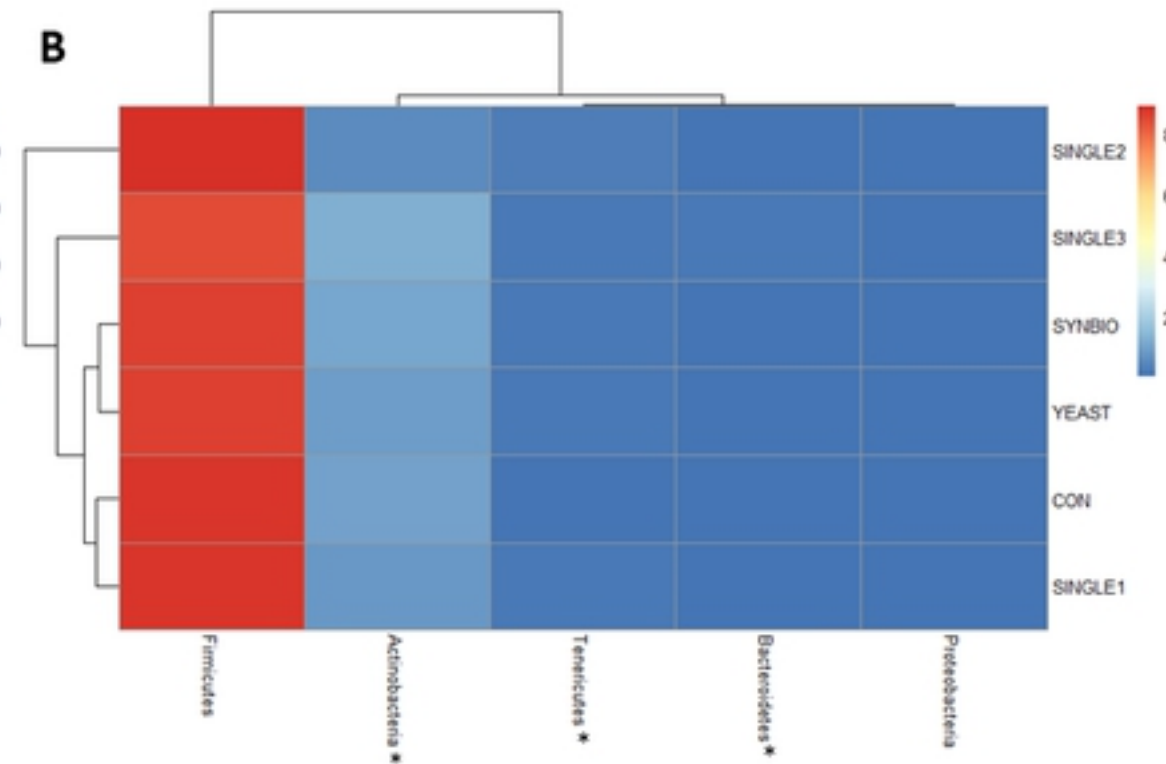

Figure 2

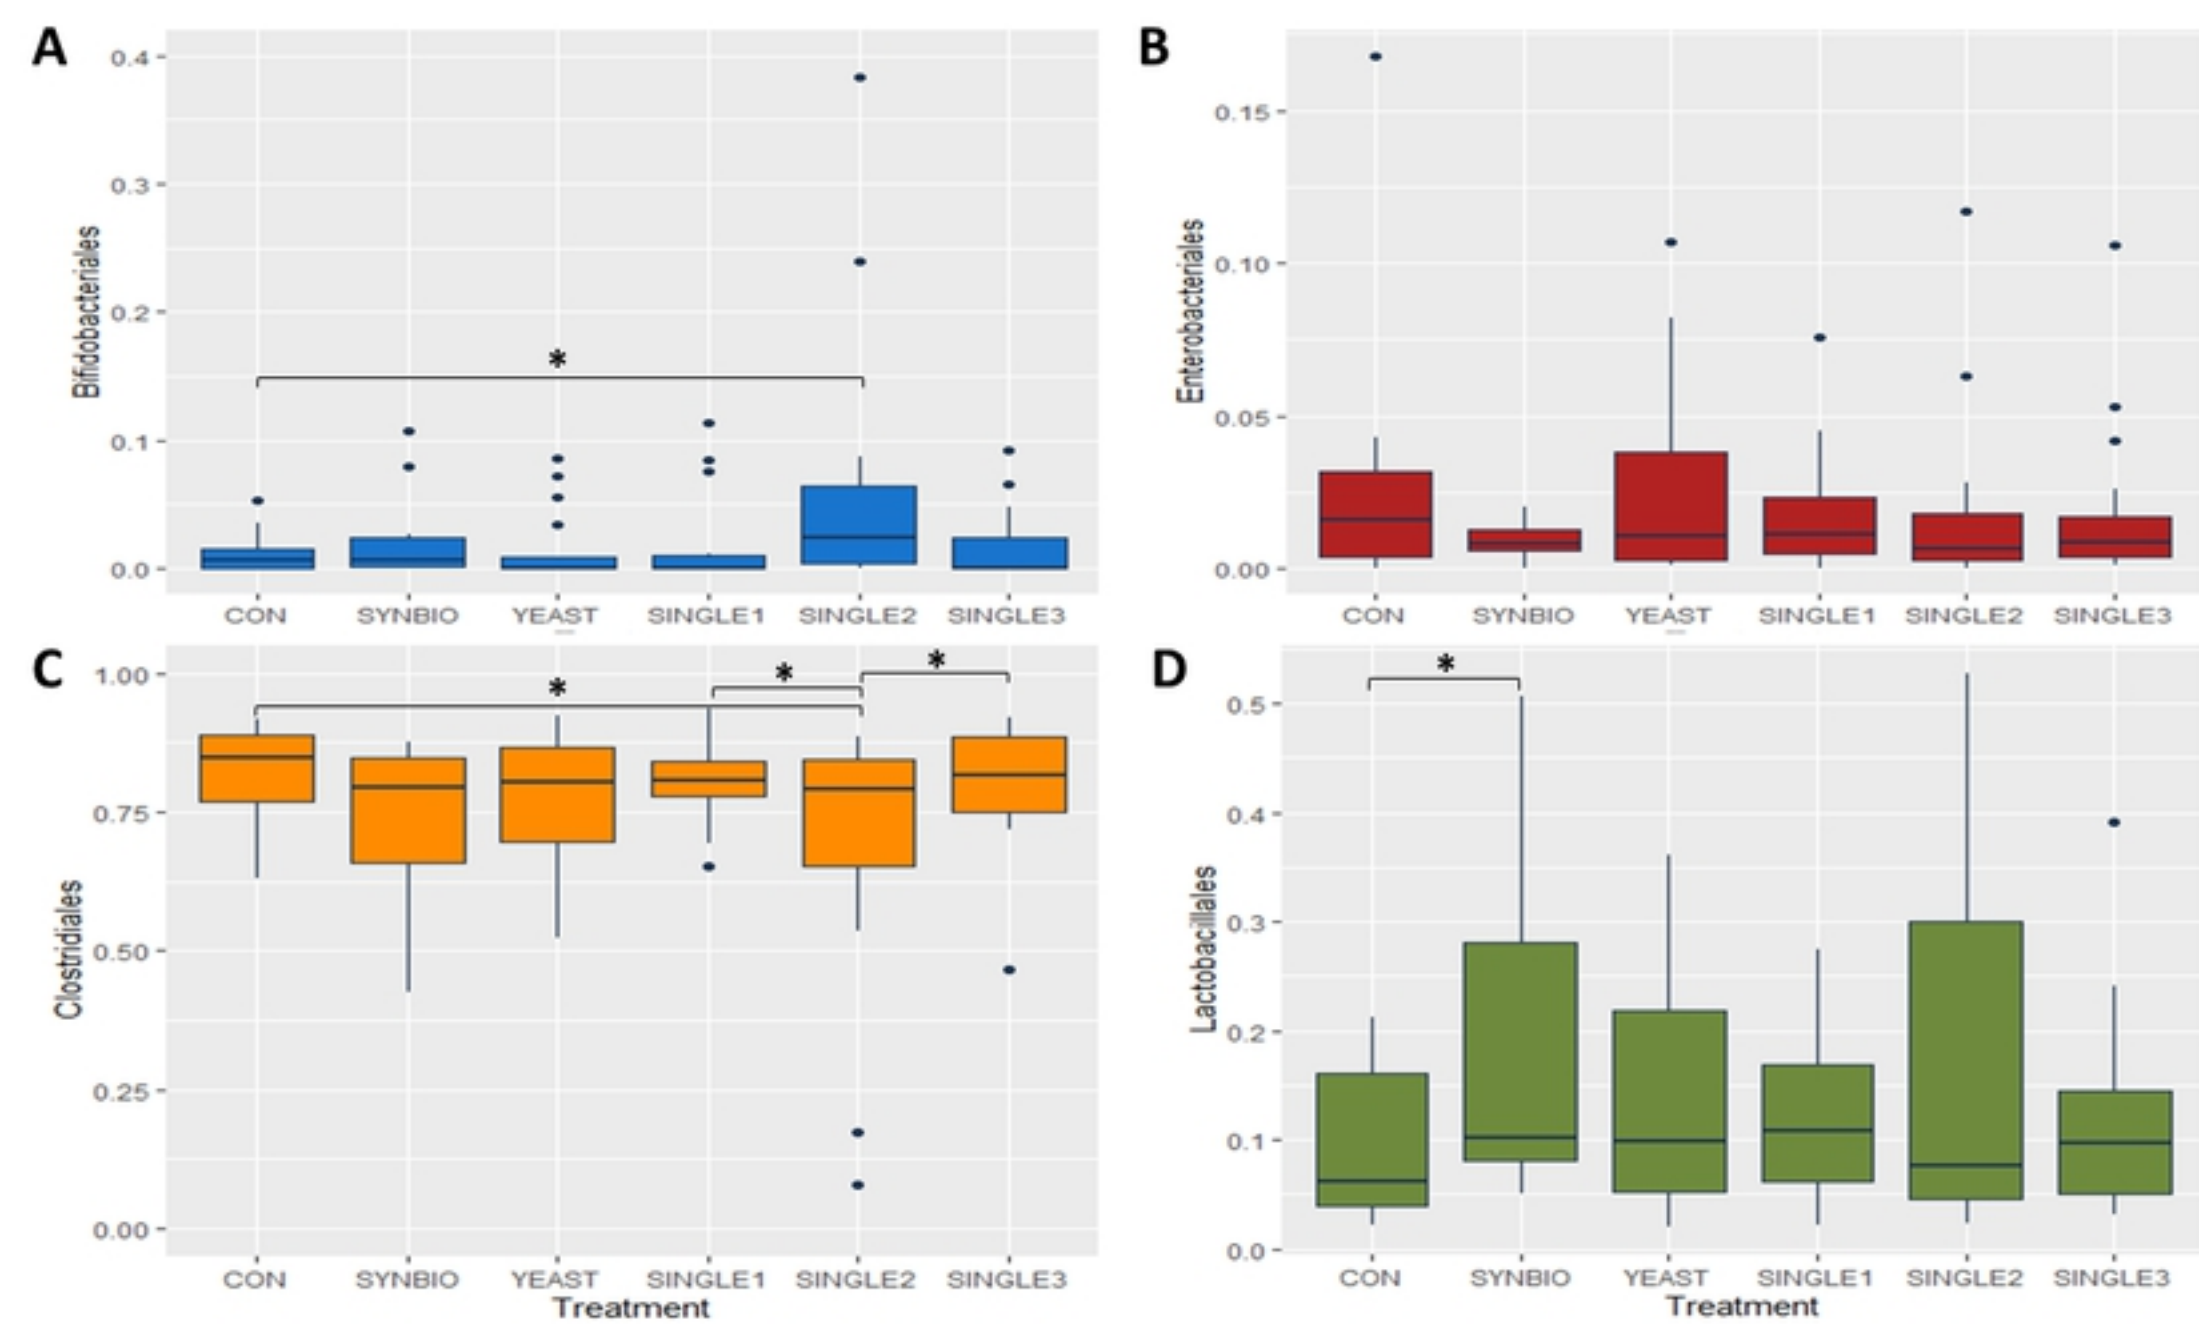

Figure 3

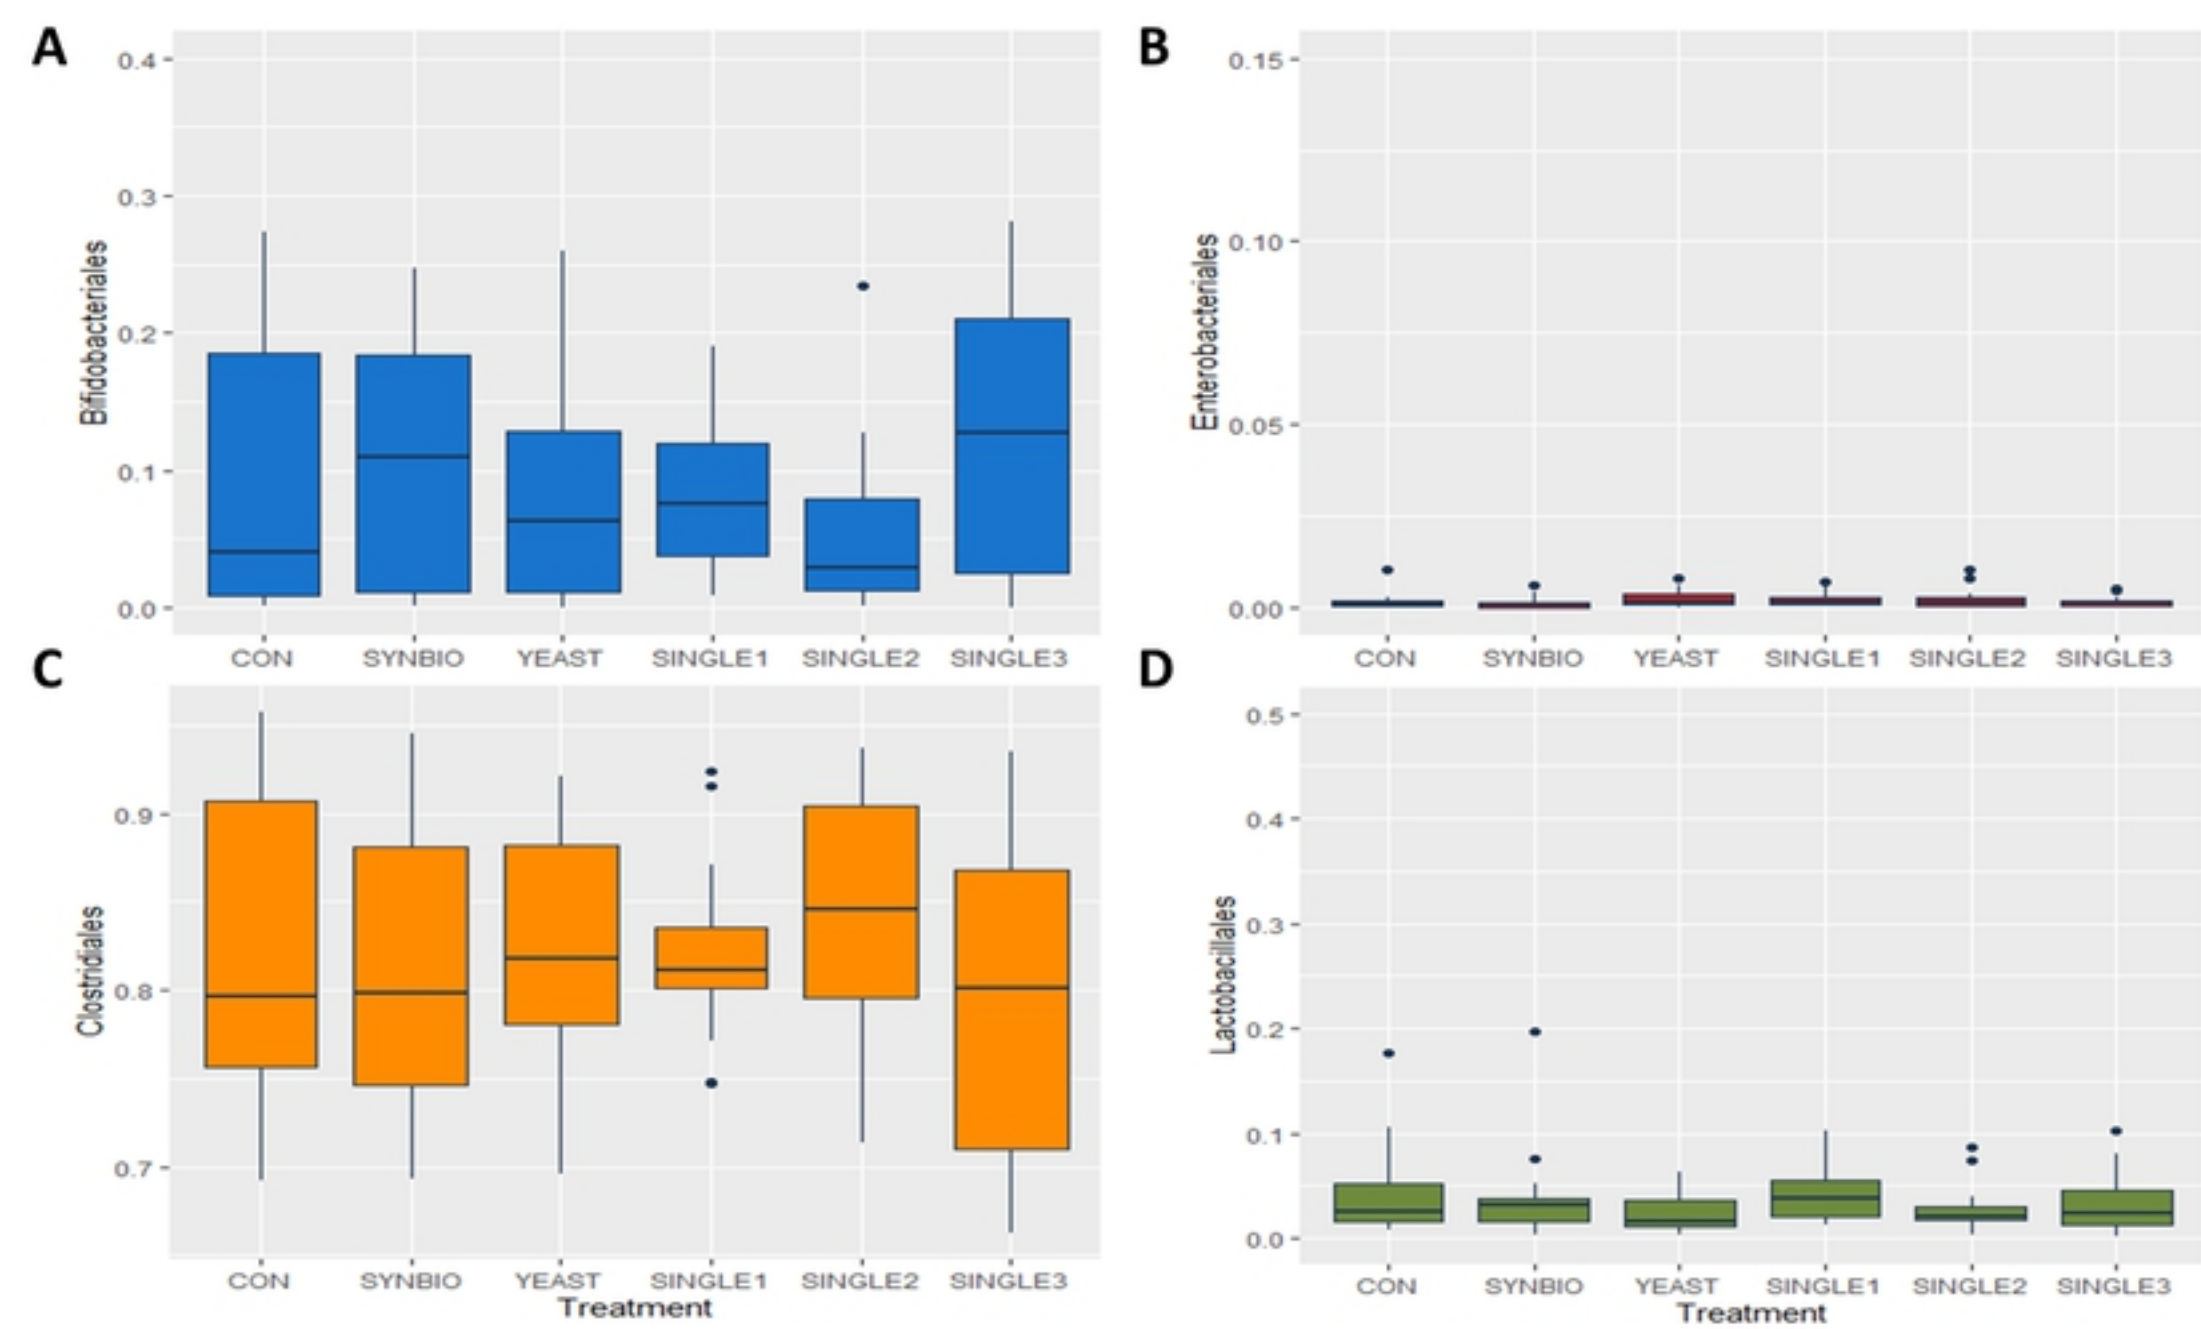

Figure 4



**A**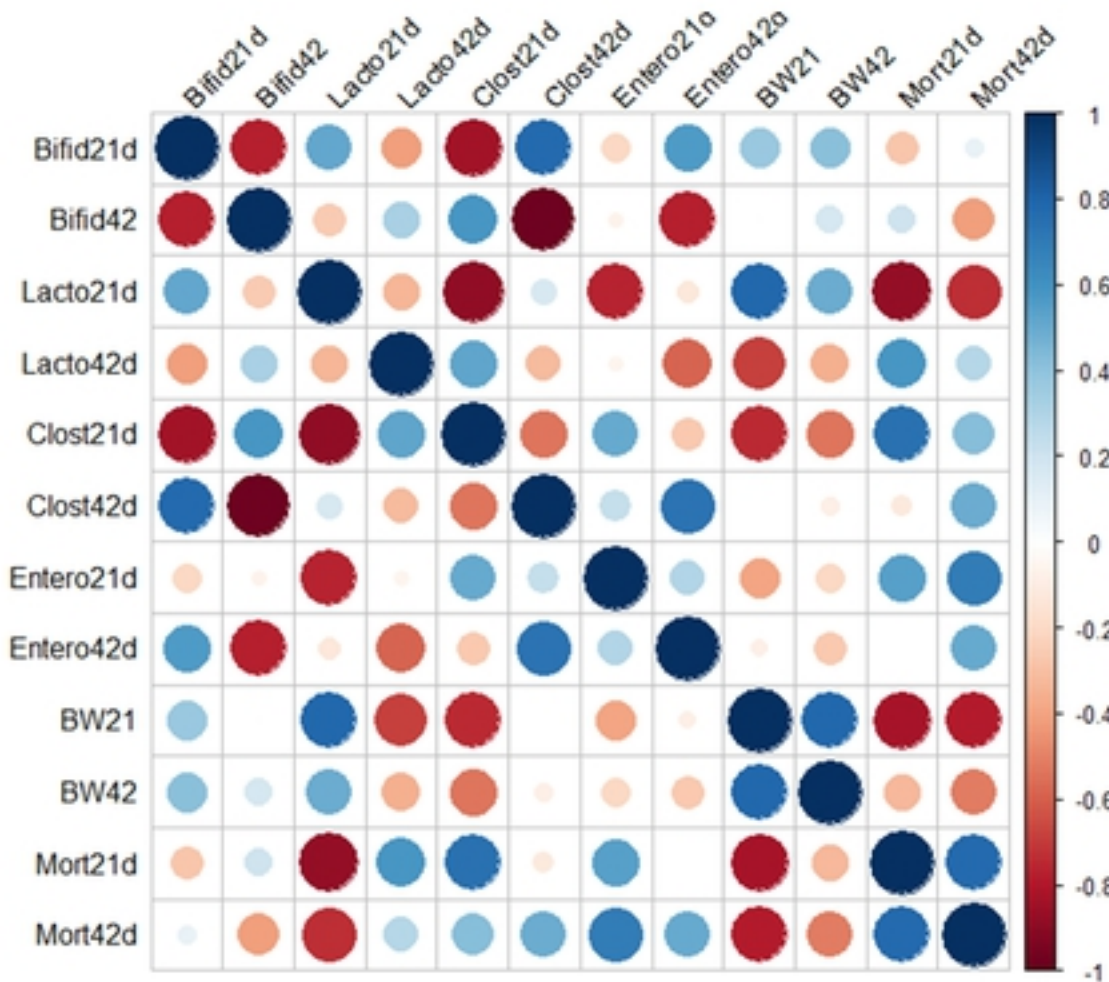**B**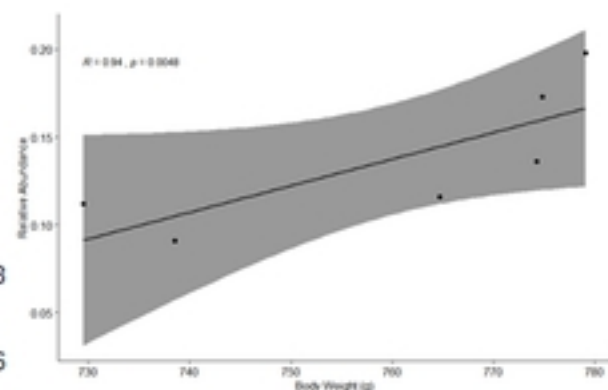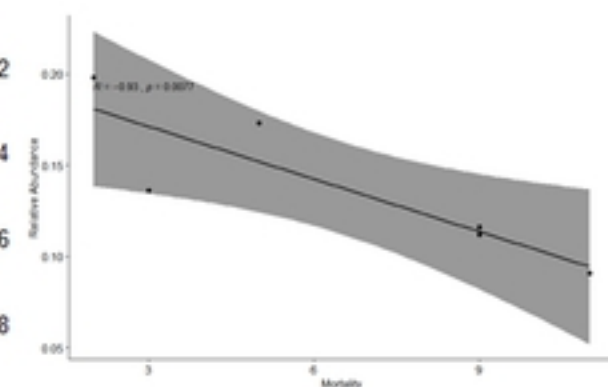**C**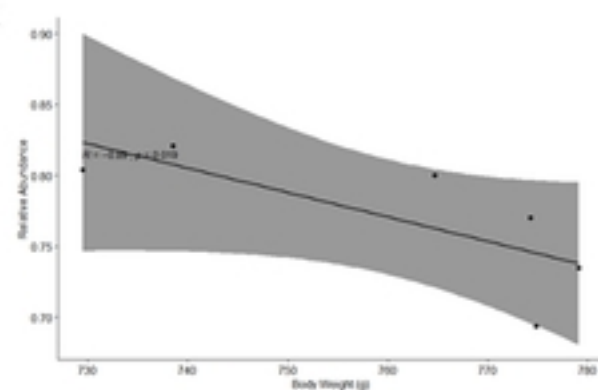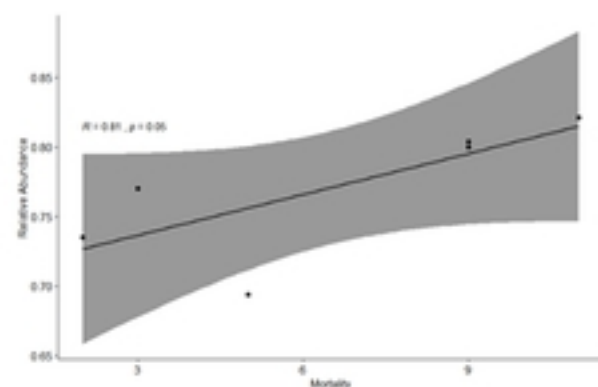

Figure 5
